# Supplementary material for: Psychological distress, neuroticism, and cause-specific mortality: early prospective evidence from UK Biobank
Source: PubMed Central journal article supplement — J Epidemiol Community Health. 2016 Aug 12;70(11):1136–9. doi: 10.1136/jech-2016-207267 (PMC5541175; doi:10.1136/jech-2016-207267), 2016-08-12
Supplement: jech-2016-207267supp_table1.pdf [file jech-2016-207267supp_table1.pdf]

**Supplemental table 1. Characteristics of the study sample according to level of psychological distress: UK Biobank (N=308,721)**

|                                                                               | Psychological distress categories |               |               | P value <sup>a</sup> |
|-------------------------------------------------------------------------------|-----------------------------------|---------------|---------------|----------------------|
|                                                                               | 1                                 | 2             | 3             |                      |
| Number                                                                        | 128,505                           | 112,635       | 67,581        |                      |
| Age (yr), mean (SD)                                                           | 57.6 (7.80)                       | 55.7 (8.12)   | 54.4 (7.99)   | <0.0001              |
| Female, N (%)                                                                 | 62,339 (48.5)                     | 63,762 (56.6) | 39,637 (58.7) | <0.0001              |
| University/college degree, no (%)                                             | 45,035 (35.1)                     | 41,868 (37.2) | 21,294 (31.5) | <0.0001              |
| Neuroticism, mean (SD)                                                        | 2.08 (2.11)                       | 3.65 (2.53)   | 6.27 (2.88)   | <0.0001              |
| Current smoker, N (%)                                                         | 9,857 (7.67)                      | 10,303 (9.15) | 9,723 (14.4)  | <0.0001              |
| <5 fruit or vegetables per day, N (%)                                         | 74,903 (58.3)                     | 69,570 (61.8) | 43,400 (64.2) | <0.0001              |
| Drinks alcohol daily or almost daily, N (%)                                   | 29,525 (23.0)                     | 24,036 (21.3) | 12,924 (19.1) | <0.0001              |
| Number of types of physical activity in last 4 weeks <sup>b</sup> , mean (SD) | 2.44 (1.14)                       | 2.33 (1.15)   | 2.03 (1.18)   | <0.0001              |
| BMI (kg/m <sup>2</sup> ), mean (SD)                                           | 26.9 (4.23)                       | 27.3 (4.71)   | 27.9 (5.22)   | <0.0001              |
| Systolic blood pressure (mmHg), mean (SD)                                     | 137.4 (18.5)                      | 134.6 (18.3)  | 133.0 (18.0)  | <0.0001              |
| Grip strength (kg), mean (SD)                                                 | 34.2 (11.2)                       | 32.8 (11.2)   | 31.7 (11.3)   | <0.0001              |
| FEV1 (litre), mean (SD)                                                       | 2.89 (0.79)                       | 2.85 (0.80)   | 2.80 (0.80)   | <0.001               |
| Reaction time (milliseconds), mean (SD)                                       | 555.5 (112.2)                     | 549.0 (109.8) | 556.9 (119.3) | <0.001               |
| Diagnosed with diabetes, N (%)                                                | 4,995 (3.89)                      | 5,148 (4.57)  | 4,189 (6.20)  | <0.0001              |
| Diagnosed with vascular disease, N (%)                                        | 33,753 (26.3)                     | 31,001 (27.5) | 20,718 (30.7) | <0.0001              |
| Diagnosed with chronic lung disease, N (%)                                    | 922 (0.72)                        | 1,248 (1.11)  | 1,345 (1.99)  | <0.0001              |
| Diagnosed with asthma, N (%)                                                  | 11,661 (9.07)                     | 12,785 (11.3) | 9,050 (13.4)  | <0.0001              |
| Diagnosed with deep vein thrombosis or pulmonary embolism, N (%)              | 2,733 (2.12)                      | 2,788 (2.47)  | 2,195 (3.23)  | <0.0001              |

<sup>a</sup> p-value indicates significance of test for linearity in the case of continuous variables and chi-square tests in the case of categorical variables. Higher distress scores indicate a greater degree of distress.

<sup>b</sup> Based on walking for pleasure, heavy do-it-yourself (e.g. weeding, lawn mowing, carpentry, digging), light do-it-yourself (e.g. pruning, watering the lawn), strenuous sports, and other exercise).
