# Supplementary material for: Psychological distress, neuroticism, and cause-specific mortality: early prospective evidence from UK Biobank
Source: PubMed Central journal article supplement — J Epidemiol Community Health. 2016 Aug 12;70(11):1136–9. doi: 10.1136/jech-2016-207267 (PMC5541175; doi:10.1136/jech-2016-207267), 2016-08-12
Supplement: jech-2016-207267supp_table2.pdf [file jech-2016-207267supp_table2.pdf]

**Supplemental table 2. Hazard ratios (95% confidence interval) for the relation of individual items from the PHQ-4 scale with total and CVD mortality : UK Biobank (N=308,721)**

|                                 | <b>All-cause mortality</b> | <b>CVD mortality</b> |
|---------------------------------|----------------------------|----------------------|
| <b>Depressed mood</b>           |                            |                      |
| 0                               | 1.0 (Reference)            | 1.0 (Reference)      |
| 1                               | 1.36 (1.26, 1.47)          | 1.39 (1.16, 1.66)    |
| 2                               | 1.31 (1.08, 1.59)          | 2.16 (1.52, 3.07)    |
| 3                               | 1.84 (1.49, 2.25)          | 1.94 (1.21, 3.10)    |
| P value for trend               | <0.0001                    | <0.0001              |
|                                 |                            |                      |
| <b>Unenthusiasm/disinterest</b> |                            |                      |
| 0                               | 1.0 (Reference)            | 1.0 (Reference)      |
| 1                               | 1.50 (1.39, 1.62)          | 1.60 (1.34, 1.90)    |
| 2                               | 1.69 (1.40, 1.99)          | 2.19 (1.54, 3.13)    |
| 3                               | 1.79 (1.48, 2.17)          | 1.93 (1.26, 2.95)    |
| P value for trend               | <0.0001                    | <0.0001              |
|                                 |                            |                      |
| <b>Tenseness/restlessness</b>   |                            |                      |
| 0                               | 1.0 (Reference)            | 1.0 (Reference)      |
| 1                               | 1.38 (1.14, 1.68)          | 1.21 (1.02, 1.42)    |
| 2                               | 1.69 (1.40, 1.99)          | 1.10 (0.67, 1.81)    |
| 3                               | 1.85 (1.51, 2.27)          | 2.32 (1.53, 3.51)    |
| P value for trend               | <0.0001                    | <0.0001              |
|                                 |                            |                      |
| <b>Tiredness/lethargy</b>       |                            |                      |
| 0                               | 1.0 (Reference)            | 1.0 (Reference)      |
| 1                               | 1.31 (1.23, 1.40)          | 1.20 (1.04, 1.39)    |
| 2                               | 1.66 (1.46, 1.89)          | 1.67 (1.26, 2.22)    |
| 3                               | 2.49 (2.23, 2.78)          | 2.72 (2.14, 3.46)    |
| P value for trend               | <0.0001                    | <0.0001              |
|                                 |                            |                      |

Effect estimates are age- and sex-adjusted
